# Supplementary material for: Prenatal Exposure to Perfluoroalkyl Substances and Birth Outcomes; An Updated Analysis from the Danish National Birth Cohort
Source: MDPI journal article supplement (doi:10.3390/ijerph15091832), 2018-08-24
Supplement: s1 [file s1]

## **Prenatal Exposure to Perfluoroalkyl Substances and Birth Outcomes; an Updated Analysis from the Danish National Birth Cohort**

**Table S1.** Pearson Correlation Coefficients between the PFASs (ng/mL) <sup>a</sup>.

|              | <b>PFOS</b> | <b>PFOA</b> | <b>PFHxS</b> | <b>PFNA</b> | <b>PFHpS</b> |
|--------------|-------------|-------------|--------------|-------------|--------------|
| <b>PFOA</b>  | 0.66        |             |              |             |              |
| <b>PFHxS</b> | 0.30        | 0.33        |              |             |              |
| <b>PFNA</b>  | 0.48        | 0.47        | 0.28         |             |              |
| <b>PFHpS</b> | 0.89        | 0.67        | 0.39         | 0.54        |              |
| <b>PFDA</b>  | 0.48        | 0.28        | 0.17         | 0.73        | 0.49         |

<sup>a</sup> Based on 3,535 samples for PFOS and PFOA, and 2,137 samples for PFHxS, PFNA, PFHpS and PFDA.

**Table S2.** Adjusted differences ( $\beta$ ) and 95% confidence intervals (CI) for birth weight in grams per doubling of prenatal PFASs levels, stratified by study sample.

| No. of<br>Subjects | Adjusted Difference in Birth Weight ( $\beta$ and 95%CI) <sup>a</sup> |                      |                      |                     |
|--------------------|-----------------------------------------------------------------------|----------------------|----------------------|---------------------|
|                    | Pooled <sup>b</sup><br>3,507                                          | Sample1<br>1,387     | Sample2<br>540       | Sample3<br>1,580    |
| <b>PFOS</b>        | -45.2 (-76.8, -13.6)                                                  | -30.0 (-81.9, 21.9)  | -51.0 (-127.6, 25.7) | -40.5 (-88.0, 7.0)  |
| <b>PFOA</b>        | -35.6 (-66.3, -5.0)                                                   | -54.1 (-102.7, -5.5) | -68.7 (-146.5, 9.0)  | 7.0 (-39.5, 53.6)   |
| <b>PFHxS</b>       | 1.2 (-28.3, 30.7)                                                     | N/A                  | -49.1 (-99.6, 1.5)   | 31.7 (-4.7, 68.1)   |
| <b>PFNA</b>        | -36.3 (-70.6, -2.0)                                                   | N/A                  | -9.7 (-75.2, 55.7)   | -41.7 (-82.5, -1.0) |
| <b>PFHpS</b>       | -38.9 (-72.6, -5.1)                                                   | N/A                  | -52.5 (-112.5, 7.4)  | -26.1 (-67.4, 15.3) |
| <b>PFDA</b>        | -9.0 (-43.2, 25.2)                                                    | N/A                  | -8.9 (-66.7, 48.8)   | -5.3 (-48.1, 37.6)  |

<sup>a</sup> Adjusted for infant sex, infant birth year, gestational week of blood draw, maternal age, parity, socio-occupational status, pre-pregnancy body mass index (BMI), smoking and alcohol intake during pregnancy. <sup>b</sup> We additionally adjusted for a study sample indicator in the model.

**Table S3.** Adjusted differences ( $\beta$ ) and 95% confidence intervals (CI) for gestational age in days per doubling of prenatal PFASs levels, stratified by study sample.

|                 | Adjusted difference in gestational age ( $\beta$ and 95%CI) <sup>a</sup> |                  |                   |                   |
|-----------------|--------------------------------------------------------------------------|------------------|-------------------|-------------------|
|                 | Pooled <sup>b</sup>                                                      | Sample1          | Sample2           | Sample3           |
| No. of subjects | 3,522                                                                    | 1,390            | 545               | 1,587             |
| <b>PFOS</b>     | -1.1 (-1.7, -0.4)                                                        | -0.6 (-1.7, 0.5) | -3.2 (-4.8, -1.6) | -0.5 (-1.5, 0.4)  |
| <b>PFOA</b>     | -0.4 (-1.0, 0.3)                                                         | -0.1 (-0.2, 0.9) | -2.3 (-3.9, -0.7) | 0.4 (-0.6, 1.3)   |
| <b>PFHxS</b>    | -0.2 (-0.8, 0.4)                                                         | N/A              | -1.3 (-2.4, -0.3) | 0.5 (-0.3, 1.2)   |
| <b>PFNA</b>     | -1.0 (-1.7, -0.3)                                                        | N/A              | -0.9 (-2.2, 0.5)  | -1.1 (-1.9, -0.2) |
| <b>PFHpS</b>    | -1.2 (-1.9, -0.5)                                                        | N/A              | -2.5 (-3.7, -1.2) | -0.6 (-1.5, 0.2)  |
| <b>PFDA</b>     | -0.6 (-1.3, 0.1)                                                         | N/A              | -1.3 (-2.5, -0.1) | -0.3 (-1.2, 0.5)  |

<sup>a</sup> Adjusted for infant sex, infant birth year, gestational week of blood draw, maternal age, parity, socio-occupational status, pre-pregnancy body mass index (BMI), smoking and alcohol intake during pregnancy. <sup>b</sup> We additionally adjusted for a study sample indicator in the model.

**Table S4.** Adjusted differences ( $\beta$ ) and 95% confidence intervals (CI) for birth weight in grams per doubling of prenatal PFASs levels, stratified by potential effect modifiers.

| Adjusted differences in birth weight ( $\beta$ and 95%CI) <sup>a</sup> ,<br>pooled samples 1, 2 and 3 |       |                       |                       | Adjusted differences in birth weight ( $\beta$ and 95%CI) <sup>a</sup> ,<br>pooled samples 2 and 3 |                       |                       |                       |                      |
|-------------------------------------------------------------------------------------------------------|-------|-----------------------|-----------------------|----------------------------------------------------------------------------------------------------|-----------------------|-----------------------|-----------------------|----------------------|
| Strata                                                                                                | No.   | PFOS                  | PFOA                  | No.                                                                                                | PFHxS                 | PFNA                  | PFHpS                 | PFDA                 |
| <b>All</b>                                                                                            | 3,507 | -45.2 (-76.8, -13.6)  | -35.6 (-66.3, -5.0)   | 2,120                                                                                              | 1.2 (-28.3, 30.7)     | -36.3 (-70.6, -2.0)   | -38.9 (-72.6, -5.1)   | -9.0 (-43.2, 25.2)   |
| <b>Sex</b>                                                                                            |       |                       |                       |                                                                                                    |                       |                       |                       |                      |
| Female                                                                                                | 1,547 | -65.3 (-111.7, -18.9) | -25.0 (-71.4, 21.5)   | 865                                                                                                | -4.4 (-48.3, 39.5)    | -26.5 (-78.9, 26.0)   | -61.0 (-112.9, -9.2)  | -16.5 (-66.3, 33.3)  |
| Male                                                                                                  | 1,960 | -24.3 (-67.1, 18.6)   | -41.5 (-82.1, -0.9)   | 1,255                                                                                              | 14.0 (-25.6, 53.7)    | -44.6 (-90.2, 1.0)    | -19.4 (-63.6, 24.9)   | -2.3 (-49.0, 44.5)   |
| p for interaction                                                                                     |       | 0.31                  | 0.39                  |                                                                                                    | 0.92                  | 0.29                  | 0.52                  | 0.79                 |
| <b>Parity</b>                                                                                         |       |                       |                       |                                                                                                    |                       |                       |                       |                      |
| Nulliparous                                                                                           | 1,653 | -38.5 (-84.0, 7.0)    | -29.7 (-77.4, 18.0)   | 1,039                                                                                              | -47.0 (-86.4, -7.5)   | -37.8 (-94.0, 18.4)   | -58.1 (-105.8, -10.3) | -39.8 (-87.2, 7.6)   |
| Parous                                                                                                | 1,854 | -57.8 (-101.7, -14.0) | -58.6 (-98.9, -18.3)  | 1,081                                                                                              | 10.2 (-34.1, 54.5)    | -49.0 (-93.3, -4.8)   | -46.1 (-93.2, 1.0)    | 20.1 (-29.4, 69.6)   |
| p for interaction                                                                                     |       | 0.89                  | 0.75                  |                                                                                                    | 0.05                  | 0.98                  | 0.18                  | 0.14                 |
| <b>BMI</b>                                                                                            |       |                       |                       |                                                                                                    |                       |                       |                       |                      |
| <18.5                                                                                                 | 150   | 58.2 (-73.5, 189.8)   | -12.7 (-161.9, 136.4) | 88                                                                                                 | -11.1 (-147.3, 125.2) | -104.5 (-240.2, 31.1) | -7.0 (-171.7, 157.8)  | -78.3 (-244.0, 87.3) |
| p for interaction <sup>b</sup>                                                                        |       | 0.11                  | 0.61                  |                                                                                                    | 0.93                  | 0.63                  | 0.88                  | 0.19                 |
| 18.5-24.9                                                                                             | 2,379 | -53.5 (-90.0, -17.0)  | -40.9 (-75.8, -6.0)   | 1,459                                                                                              | -6.1 (-41.4, 29.3)    | -32.7 (-74.6, 9.2)    | -50.1 (-89.7, -10.5)  | 11.9 (-28.6, 52.4)   |
| ≥25.0                                                                                                 | 978   | -53.4 (-121.3, 14.5)  | -23.0 (-89.5, 43.4)   | 573                                                                                                | 3.4 (-56.4, 63.2)     | -29.9 (-104.6, 44.7)  | -19.3 (-89.2, 50.5)   | -32.6 (-103.4, 38.2) |
| p for interaction <sup>b</sup>                                                                        |       | 0.43                  | 0.41                  |                                                                                                    | 0.43                  | 0.60                  | 0.74                  | 0.21                 |

<sup>a</sup> Adjusted for a study sample indicator, infant sex, infant birth year, gestational week of blood draw, maternal age, parity, socio-occupational status, pre-pregnancy body mass index (BMI), smoking and alcohol intake during pregnancy. <sup>b</sup> P-values for interaction were calculated in reference to the 'normal' BMI (18.5-24.9) group.

**Table S5.** Adjusted differences ( $\beta$ ) and 95% confidence intervals (CI) for gestational age in days per doubling of prenatal PFASs levels, stratified by potential effect modifiers.

| Adjusted difference in gestational age ( $\beta$ and 95%CI) <sup>a</sup> ,<br>pooled sample 1, 2 and 3 |       |                   |                  | Adjusted difference in gestational age ( $\beta$ and 95%CI) <sup>a</sup> ,<br>pooled sample 2 and 3 |                  |                   |                   |                   |
|--------------------------------------------------------------------------------------------------------|-------|-------------------|------------------|-----------------------------------------------------------------------------------------------------|------------------|-------------------|-------------------|-------------------|
| Strata                                                                                                 | No.   | PFOS              | PFOA             | No.                                                                                                 | PFHxS            | PFNA              | PFHpS             | PFDA              |
| <b>All</b>                                                                                             | 3,522 | -1.1 (-1.7, -0.4) | -0.4 (-1.0, 0.3) | 2,132                                                                                               | -0.2 (-0.8, 0.4) | -1.0 (-1.7, -0.3) | -1.2 (-1.9, -0.5) | -0.6 (-1.3, 0.1)  |
| <b>Sex</b>                                                                                             |       |                   |                  |                                                                                                     |                  |                   |                   |                   |
| Female                                                                                                 | 1,553 | -1.0 (-2.0, 0.0)  | -0.1 (-1.1, 0.9) | 869                                                                                                 | 0.1 (-0.8, 1.0)  | 0.0 (-1.0, 1.1)   | -1.1 (-2.1, 0.0)  | 0.1 (-0.9, 1.1)   |
| Male                                                                                                   | 1,969 | -1.1 (-2.0, -0.3) | -0.6 (-1.4, 0.3) | 1,263                                                                                               | -0.4 (-1.2, 0.4) | -1.9 (-2.8, -1.0) | -1.3 (-2.2, -0.4) | -1.2 (-2.1, -0.2) |
| p for interaction                                                                                      |       | 0.72              | 0.83             |                                                                                                     | 0.50             | 0.05              | 1.00              | 0.18              |
| <b>Parity</b>                                                                                          |       |                   |                  |                                                                                                     |                  |                   |                   |                   |
| 0                                                                                                      | 1,660 | -1.2 (-2.2, -0.2) | -0.2 (-1.2, 0.9) | 1,045                                                                                               | -0.6 (-1.5, 0.2) | -0.4 (-1.6, 0.8)  | -1.3 (-2.3, -0.3) | -0.5 (-1.5, 0.5)  |
| ≥1                                                                                                     | 1,862 | -1.0 (-1.8, -0.1) | -0.5 (-1.3, 0.2) | 1,087                                                                                               | -0.2 (-1.1, 0.6) | -1.3 (-2.2, -0.5) | -1.3 (-2.2, -0.4) | -0.5 (-1.5, 0.4)  |
| p for interaction                                                                                      |       | 0.22              | 0.90             |                                                                                                     | 0.48             | 0.38              | 0.37              | 0.95              |
| <b>BMI</b>                                                                                             |       |                   |                  |                                                                                                     |                  |                   |                   |                   |
| <18.5                                                                                                  | 150   | -0.5 (-3.8, 2.8)  | -2.2 (-5.9, 1.5) | 88                                                                                                  | -0.9 (-4.9, 3.1) | -4.8 (-8.7, -0.9) | -0.9 (-5.7, 3.8)  | -3.2 (-8.0, 1.6)  |
| p for interaction <sup>b</sup>                                                                         |       | 0.79              | 0.13             |                                                                                                     | 0.94             | 0.03              | 0.86              | 0.01              |
| 18.5-24.9                                                                                              | 2,393 | -0.7 (-1.5, 0.0)  | 0.0 (-0.7, 0.7)  | 1,469                                                                                               | -0.4 (-1.1, 0.3) | 0.0 (-0.9, 0.8)   | -1.1 (-1.9, -0.3) | 0.5 (-0.4, 1.3)   |
| ≥25.0                                                                                                  | 979   | -1.8 (-3.2, -0.5) | -0.3 (-1.7, 1.0) | 575                                                                                                 | 0.5 (-0.6, 1.5)  | -1.5 (-2.9, -0.2) | -1.0 (-2.3, 0.2)  | -1.7 (-3.0, -0.5) |
| p for interaction <sup>b</sup>                                                                         |       | 0.05              | 0.25             |                                                                                                     | 0.43             | 0.01              | 0.80              | 0.00              |

<sup>a</sup> Adjusted for a study sample indicator, infant sex, infant birth year, gestational week of blood draw, maternal age, parity, socio-occupational status, pre-pregnancy body mass index (BMI), smoking and alcohol intake during pregnancy. <sup>b</sup> P-values for interaction were calculated in reference to the 'normal' BMI (18.5-24.9) group.

**Table S6.** Differences ( $\beta$ ) and 95% confidence intervals (CI) for birth weight per doubling of prenatal PFASs levels additionally adjusted for dietary factors.

|                                                        |                  | Low birth weight     |                      | Preterm birth        |                      |
|--------------------------------------------------------|------------------|----------------------|----------------------|----------------------|----------------------|
|                                                        |                  | Model 1 <sup>a</sup> | Model 2 <sup>b</sup> | Model 1 <sup>a</sup> | Model 2 <sup>b</sup> |
| Adjusted OR and 95%CI, pooled sample 1, sample 2 and 3 | <b>No. Cases</b> | 61                   | 61                   | 112                  | 112                  |
|                                                        | <b>PFOS</b>      | 1.3 (0.9, 2.0)       | 1.3 (0.8, 1.9)       | 1.5 (1.1, 2.2)       | 1.6 (1.1, 2.2)       |
|                                                        | <b>PFOA</b>      | 1.0 (0.7, 1.5)       | 1.0 (0.7, 1.5)       | 1.1 (0.8, 1.5)       | 1.2 (0.8, 1.6)       |
|                                                        | <b>No. Cases</b> | 37                   | 37                   | 59                   | 59                   |
| Adjusted OR and 95%CI, pooled sample 2 and 3           | <b>PFHxS</b>     | 1.2 (0.8, 1.7)       | 1.2 (0.8, 1.8)       | 1.1 (0.8, 1.5)       | 1.1 (0.8, 1.5)       |
|                                                        | <b>PFNA</b>      | 1.5 (0.9, 2.4)       | 1.6 (0.9, 2.6)       | 1.4 (0.9, 2.1)       | 1.5 (1.0, 2.2)       |
|                                                        | <b>PFHpS</b>     | 1.0 (0.6, 1.5)       | 1.0 (0.6, 1.5)       | 1.5 (1.0, 2.1)       | 1.5 (1.1, 2.2)       |
|                                                        | <b>PFDA</b>      | 1.2 (0.8, 1.9)       | 1.3 (0.8, 2.1)       | 1.7 (1.2, 2.5)       | 1.8 (1.2, 2.6)       |

<sup>a</sup> Adjusted for a study sample indicator, infant sex, infant birth year, gestational week of blood draw, maternal age, parity, socio-occupational status, pre-pregnancy body mass index (BMI), smoking and alcohol intake during pregnancy. <sup>b</sup> Adjusted for a study sample indicator, infant sex, infant birth year, gestational week of blood draw, maternal age, parity, socio-occupational status, pre-pregnancy body mass index (BMI), smoking, alcohol intake during pregnancy, fish intake and ecological/organic food consumption during pregnancy.

**Table S7.** Adjusted differences ( $\beta$ ) and 95% confidence intervals (CI) for birth weight in grams among all or term birth and birth weight Z-score per doubling of prenatal PFASs levels.

|                      |              | Adjusted differences in birth weight  |                       | Adjusted differences in birth weight<br>among term birth only |                       | Adjusted differences in Z-score <sup>c</sup> |                       |
|----------------------|--------------|---------------------------------------|-----------------------|---------------------------------------------------------------|-----------------------|----------------------------------------------|-----------------------|
|                      |              | $(\beta \text{ and } 95\% \text{CI})$ |                       | $(\beta \text{ and } 95\% \text{CI})$                         |                       | $(\beta \text{ and } 95\% \text{CI})$        |                       |
|                      |              | Crude <sup>a</sup>                    | Adjusted <sup>b</sup> | Crude <sup>a</sup>                                            | Adjusted <sup>b</sup> | Crude <sup>a</sup>                           | Adjusted <sup>b</sup> |
|                      | <b>No.</b>   | 3,507                                 | 3,507                 | 3,387                                                         | 3,387                 | 3498                                         | 3498                  |
| pooled               | <b>PFOS</b>  | -43.8 (-75.3, -12.4)                  | -45.2 (-76.8, -13.6)  | -26.4 (-56.2, 3.4)                                            | -25.2 (-55.3, 4.8)    | -0.05 (-0.11, 0.01)                          | -0.04 (-0.09, 0.02)   |
| sample 1, 2<br>and 3 | <b>PFOA</b>  | -90.1 (-117.9, -62.2)                 | -35.6 (-66.3, -5.0)   | -78.5 (-104.8, -52.2)                                         | -24.0 (-53.2, 5.2)    | -0.17 (-0.22, -0.12)                         | -0.05 (-0.10, 0.01)   |
|                      | <b>No.</b>   | 2,120                                 | 2,120                 | 2,057                                                         | 2,057                 | 2,115                                        | 2,115                 |
| pooled               | <b>PFHxS</b> | -59.3 (-88.3, -30.2)                  | 1.2 (-28.3, 30.7)     | -55.4 (-82.9, -28.0)                                          | 3.1 (-24.9, 31.2)     | -0.10 (-0.15, -0.05)                         | 0.02 (-0.04, 0.07)    |
| sample 2 and<br>3    | <b>PFNA</b>  | -60.4 (-94.1, -26.7)                  | -36.3 (-70.6, -2.0)   | -46.0 (-78.2, -13.8)                                          | -20.6 (-53.7, 12.5)   | -0.08 (-0.14, -0.02)                         | -0.02 (-0.08, 0.04)   |
|                      | <b>PFHpS</b> | -64.1 (-97.1, -31.1)                  | -38.9 (-72.6, -5.1)   | -57.8 (-89.3, -26.2)                                          | -26.5 (-58.9, 6.0)    | -0.09 (-0.15, -0.03)                         | -0.02 (-0.08, 0.04)   |
|                      | <b>PFDA</b>  | -18.6 (-53.5, 16.2)                   | -9.0 (-43.2, 25.2)    | 0.8 (-32.9, 34.5)                                             | 10.4 (-22.9, 43.6)    | -0.01 (-0.07, 0.06)                          | 0.02 (-0.05, 0.08)    |

<sup>a</sup> Adjusted for a study sample indicator. <sup>b</sup> Adjusted for a study sample indicator, infant sex, infant birth year, gestational week of blood draw, maternal age, parity, socio-occupational status, pre-pregnancy body mass index (BMI), smoking and alcohol intake during pregnancy. <sup>c</sup> Excluded births with missing gestational age and also infants born < week 25 or > week 43 to avoid unstable z-scores in extreme gestational weeks.

**Table S8.** Adjusted differences ( $\beta$ ) and 95% confidence intervals (CI) for birth weight in grams and gestational age in days per doubling of prenatal PFASs levels mutually adjusting for different PFASs.

|              | Adjusted differences in birth weight ( $\beta$ and 95%CI) <sup>a</sup>    |                         |                         |
|--------------|---------------------------------------------------------------------------|-------------------------|-------------------------|
|              | pooled sample 1, 2 and 3                                                  | pooled sample 2 and 3   |                         |
|              | Model 1 <sup>b</sup>                                                      | Model 2 <sup>c</sup>    | Model 3 <sup>d</sup>    |
| <b>No.</b>   | 3,507                                                                     | 2,120                   | 2,120                   |
| <b>PFOS</b>  | -38.11 (-82.09, 5.88)                                                     | -48.12 (-135.39, 39.15) | -55.53 (-145.59, 34.54) |
| <b>PFOA</b>  | -9.94 (-52.63, 32.75)                                                     | 44.20 (-13.42, 101.82)  | 49.56 (-8.74, 107.86)   |
| <b>PFHxS</b> | N/A                                                                       | N/A                     | 24.95 (-10.14, 60.05)   |
| <b>PFNA</b>  | N/A                                                                       | -25.02 (-68.51, 18.48)  | -54.24 (-105.83, -2.65) |
| <b>PFHpS</b> | N/A                                                                       | -14.51 (-88.38, 59.36)  | -35.15 (-114.00, 43.70) |
| <b>PFDA</b>  | N/A                                                                       | N/A                     | 47.98 (-0.56, 96.52)    |
|              | Adjusted differences in gestational age ( $\beta$ and 95%CI) <sup>a</sup> |                         |                         |
|              | pooled sample 1, 2 and 3                                                  | pooled sample 2 and 3   |                         |
|              | Model 1 <sup>b</sup>                                                      | Model 2 <sup>c</sup>    | Model 3 <sup>d</sup>    |
| <b>No.</b>   | 3,522                                                                     | 2,132                   | 2,132                   |
| <b>PFOS</b>  | -1.61 (-2.52, -0.71)                                                      | -0.37 (-2.12, 1.38)     | -0.37 (-2.19, 1.44)     |
| <b>PFOA</b>  | 0.73 (-0.15, 1.61)                                                        | 1.37 (0.21, 2.53)       | 1.41 (0.24, 2.58)       |
| <b>PFHxS</b> | N/A                                                                       | N/A                     | 0.47 (-0.23, 1.18)      |
| <b>PFNA</b>  | N/A                                                                       | -0.59 (-1.47, 0.28)     | -0.95 (-1.99, 0.08)     |
| <b>PFHpS</b> | N/A                                                                       | -1.39 (-2.88, 0.09)     | -1.78 (-3.36, -0.19)    |
| <b>PFDA</b>  | N/A                                                                       | N/A                     | 0.56 (-0.41, 1.54)      |

<sup>a</sup> Adjusted for a study sample indicator, infant sex, infant birth year, gestational week of blood draw, maternal age, parity, socio-occupational status, pre-pregnancy body mass index (BMI), smoking and alcohol intake during pregnancy. <sup>b</sup> Additionally co-adjusted for PFOS and PFOA in the same model. <sup>c</sup> Additionally co-adjusted for PFOS, PFOA, PFNA PFHpS in the same model. <sup>d</sup> Additionally co-adjusted for PFOS, PFOA, PFHxS, PFNA, PFHpS and PFDA in the same model.



**Table S9.** Adjusted Odds Ratios (OR) and 95% confidence intervals(CI) for low birth weight and preterm birth according to different cutoff points and per doubling of prenatal PFASs levels.

|                                                                              |                  | <2260 g (1st<br>percentile) | <2500 g<br>(~2nd percentile) | <2650 g<br>(3rd percentile) | < 35 completed<br>weeks | < 36 completed<br>weeks | < 37 completed<br>weeks |
|------------------------------------------------------------------------------|------------------|-----------------------------|------------------------------|-----------------------------|-------------------------|-------------------------|-------------------------|
| Adjusted OR <sup>a</sup><br>and 95%CI,<br>pooled sample 1,<br>sample 2 and 3 | <b>No. Cases</b> | 34                          | 61                           | 102                         | 32                      | 62                      | 112                     |
|                                                                              | <b>PFOS</b>      | 1.1 (0.7, 1.9)              | 1.3 (0.9, 2.0)               | 1.7 (1.2, 2.3)              | 1.2 (0.7, 2.1)          | 1.5 (0.9, 2.3)          | 1.5 (1.1, 2.2)          |
|                                                                              | <b>PFOA</b>      | 1.0 (0.6, 1.6)              | 1.0 (0.7, 1.5)               | 1.2 (0.9, 1.7)              | 1.1 (0.6, 2.0)          | 1.0 (0.6, 1.5)          | 1.1 (0.8, 1.5)          |
|                                                                              | <b>No. Cases</b> | 21                          | 37                           | 61                          | 19                      | 34                      | 59                      |
| Adjusted OR <sup>a</sup><br>and 95%CI,<br>pooled sample 2<br>and 3           | <b>PFHxS</b>     | 1.3 (0.8, 2.1)              | 1.2 (0.8, 1.7)               | 1.1 (0.8, 1.5)              | 1.0 (0.6, 1.7)          | 1.0 (0.6, 1.4)          | 1.1 (0.8, 1.5)          |
|                                                                              | <b>PFNA</b>      | 1.4 (0.8, 2.7)              | 1.5 (0.9, 2.4)               | 1.5 (1.0, 2.2)              | 2.2 (1.1, 4.7)          | 2.3 (1.2, 4.2)          | 1.4 (0.9, 2.1)          |
|                                                                              | <b>PFHpS</b>     | 0.8 (0.5, 1.3)              | 1.0 (0.6, 1.5)               | 1.3 (0.9, 1.8)              | 1.0 (0.5, 1.8)          | 1.6 (1.0, 2.7)          | 1.5 (1.0, 2.1)          |
|                                                                              | <b>PFDA</b>      | 1.5 (0.8, 2.6)              | 1.2 (0.8, 1.9)               | 1.2 (0.8, 1.8)              | 1.7 (0.9, 3.1)          | 2.0 (1.3, 3.2)          | 1.7 (1.2, 2.5)          |

<sup>a</sup> Adjusted for a study sample indicator, infant sex, infant birth year, gestational week of blood draw, maternal age, parity, socio-occupational status, pre-pregnancy body mass index (BMI), smoking and alcohol intake during pregnancy.
